# Supplementary material for: Primary Thromboprophylaxis in Ambulatory Pancreatic Cancer Patients Receiving Chemotherapy: A Systematic Review and Meta-Analysis of Randomized Controlled Trials
Source: MDPI journal article supplement (doi:10.3390/cancers12082028), 2020-07-24
Supplement: s1 [file s1]

# Supplementary Materials: Primary Thromboprophylaxis in Ambulatory Pancreatic Cancer Patients receiving Chemotherapy: A systematic Review and Meta-analysis of Randomized Controlled Trials.

Corinne Frere, Benjamin Crichi, Barbara Bournet, Cindy Canivet, Nassim Ait Abdallah, Louis Buscail and Dominique Farge

**Table S1.** Quality assessment of included studies according to the Jadad score.

| Author, Year, Study    | Randomization | Appropriate randomization scheme | Double-blind | Appropriate double blinding | Description of dropouts and withdrawals | Sum score |
|------------------------|---------------|----------------------------------|--------------|-----------------------------|-----------------------------------------|-----------|
| Agnelli 2009 PROTECHT  | 1             | 1                                | 1            | 1                           | 1                                       | 5         |
| Agnelli 2012 SAVE-ONCO | 1             | 1                                | 1            | 1                           | 1                                       | 5         |
| Maraveyas 2012 FRAGEM  | 1             | 1                                | 0 (open)     | 0 (open)                    | -                                       | 2         |
| Pelzer 2015 CONKO [    | 1             | 1                                | 0 (open)     | 0 (open)                    | -                                       | 2         |
| Khorana 2019 CASSINI   | 1             | 1                                | 1            | 1                           | 1                                       | 5         |

Points were awarded as follows: study described as randomized, 1 point; appropriate randomization, 1 point; subjects blinded to intervention, 1 point; evaluator blinded to intervention, 1 point; description of withdrawals and dropouts, 1 point.

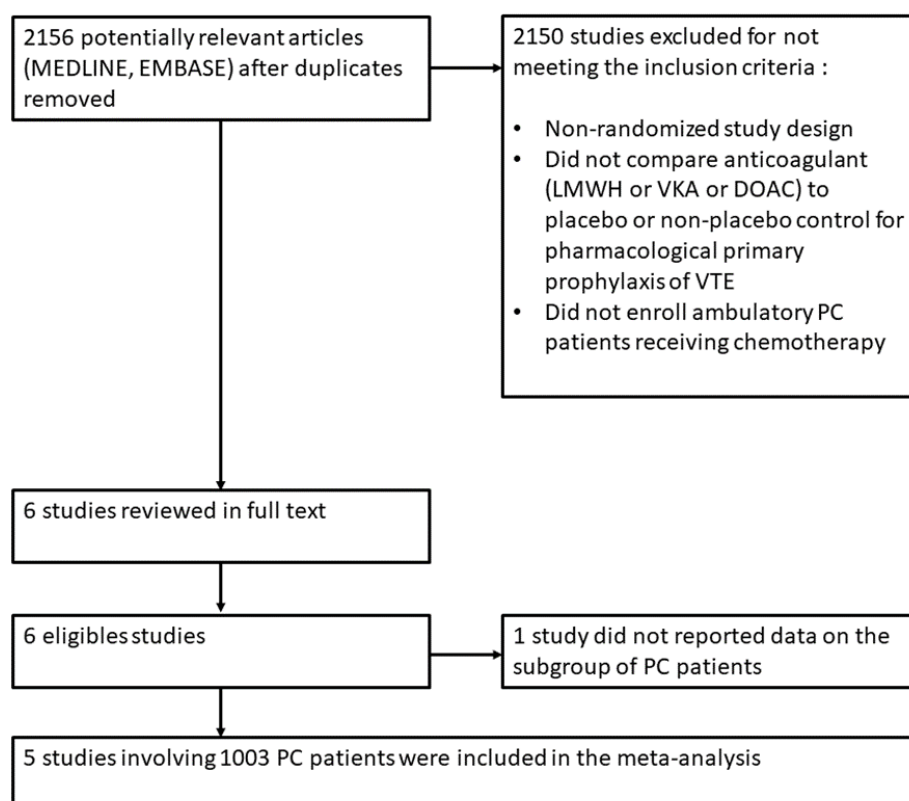

**Figure S1.** Search Flow Diagram.

|                        | Random sequence generation (selection bias) | Allocation concealment (selection bias) | Blinding of participants and personnel (performance bias) | Blinding of outcome assessment (detection bias) | Incomplete outcome data (attrition bias) | Selective reporting (reporting bias) | Other bias |
|------------------------|---------------------------------------------|-----------------------------------------|-----------------------------------------------------------|-------------------------------------------------|------------------------------------------|--------------------------------------|------------|
| Agnelli 2009 PROTECT   | +                                           | +                                       | +                                                         | +                                               | +                                        | +                                    | +          |
| Agnelli 2012 SAVE-ONCO | +                                           | +                                       | +                                                         | +                                               | +                                        | +                                    | +          |
| Khorana 2019 CASSINI   | +                                           | +                                       | +                                                         | +                                               | +                                        | +                                    | +          |
| Maraveyas 2012 FRAGEM  | +                                           | +                                       | −                                                         | +                                               | +                                        | +                                    | +          |
| Pelzer 2015 CONKO      | +                                           | +                                       | −                                                         | +                                               | +                                        | +                                    | +          |

**Figure S2.** Quality assessment of included studies according to the Cochrane risk assessment tool.

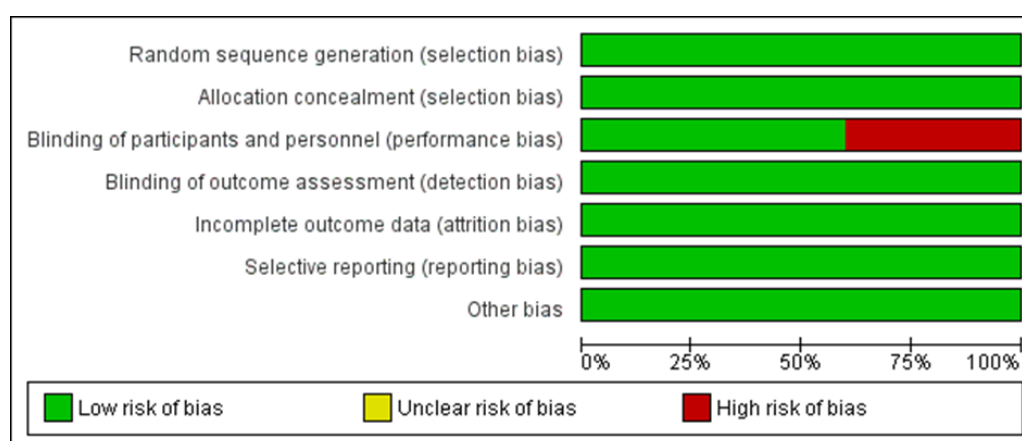

**Figure S3.** Risk of bias presented as percentages across all included studies according to the Cochrane risk assessment tool.

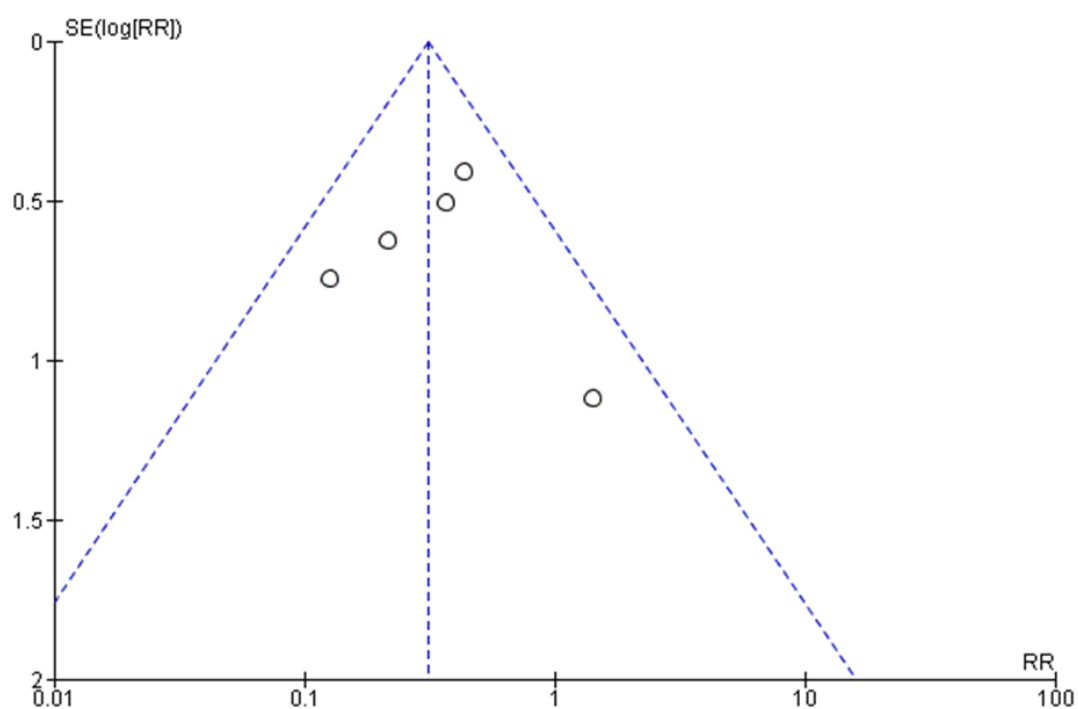

**Figure S4.** Funnel Plot for Venous Thromboembolism.

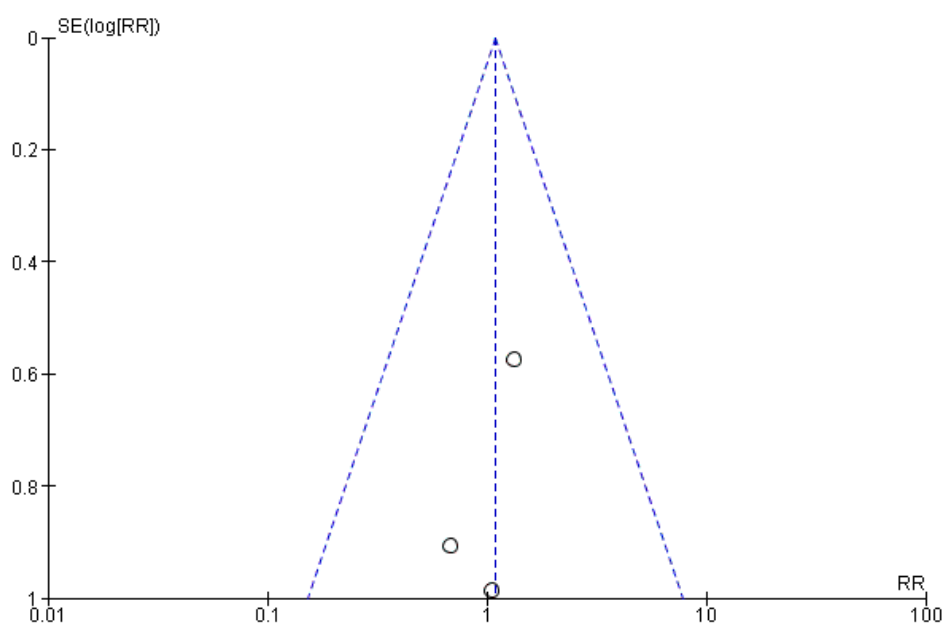

**Figure S5.** Funnel Plot for Major bleeding.

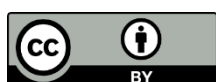

© 2020 by the authors. Submitted for possible open access publication under the terms and conditions of the Creative Commons Attribution (CC BY) license (<http://creativecommons.org/licenses/by/4.0/>).
